# Supplementary material for: Mulliken–Hush analysis of a bis(triarylamine) mixed-valence system with a N⋯N distance of 28.7 Å
Source: Royal Society of Chemistry journal article supplement (doi:10.1039/b604603g), 2006-01-01
Supplement: b604603g.pdf [file b604603g.pdf]

## Supplementary data

### “Mulliken-Hush analysis of a bis(triarylamine) mixed-valence system with a $N\cdots N$ distance of 28.7 Å”

Alexander Heckmann, Stephan Amthor and Christoph Lambert\*

Institute of Organic Chemistry  
University of Würzburg  
Am Hubland  
97074 Würzburg  
Germany  
Fax: +49 931 888 4606  
E-mail: [lambert@chemie.uni-wuerzburg.de](mailto:lambert@chemie.uni-wuerzburg.de)

**General.** All reagents were obtained from commercial suppliers and were used without further purification. Diethylamine was freshly distilled and stored under nitrogen atmosphere. Thin-layer chromatography was carried out on Merck silica gel plates (60 F<sub>254</sub>). Merck silica gel 32-63 μm was used for flash chromatography. The NMR spectra were recorded on Bruker AVANCE DMX 600 FT-NMR (600MHz) instrument in acetone-d<sub>6</sub> (calibrated at 2.05 and 29.8 ppm for <sup>1</sup>H and <sup>13</sup>C experiments, respectively). Mass spectra (MS) were determined on a Finnigan MAT 90 mass spectrometer at 70eV ionising voltage (EI), ESI pos and APCI pos high resolution measurements were determined on a Bruker Daltonik micrOTOF focus spectrometer. The melting points were measured with a melting apparatus by Dr. Tottoli from Büchi and are not corrected.

**Synthesis of 1,4-Bis{4-[2-(4-bis(4-methoxyphenyl)amino)phenyl]ethynyl}phenyl}buta-1,3-diyne (1a):** Silane **4a** (160 mg, 200 μmol, 1.00 equiv.) and Cu(I)Cl (23.7 mg, 240 μmol, 1.20 equiv.) were dissolved in 4 ml of dry dimethylformamide and the solution was stirred vigorously at 60 °C for 3 days. Water (30ml) was added and the mixture was extracted with dichloromethane (3 x 100 ml). The organic layer was washed with water (2 x 50 ml), dried over MgSO<sub>4</sub> and the solvent was removed in vacuo. The crude product was further purified by flash chromatography on silica gel (petroleum ether / dichloromethane (1 / 1)) to obtain a red-brown solid (115 mg, 134 μmol, 67 %), m.p. 102 °C. <sup>1</sup>H-NMR (600 MHz, acetone-d<sub>6</sub>, 299 K): δ / ppm = 7.60 (AA', 4H, CCCCCCHCHC or CCCCCHCHC), 7.54 (BB', 4H, CCCCCCHCHC or CCCCCHCHC), 7.35 (AA', NCCHCHC or NCCHCHC), 7.12 (AA', 8H, NCCHCHCOCH<sub>3</sub> or NCCHCHCOCH<sub>3</sub>), 6.95 (BB', 8H,

$\text{NCCCHCOCH}_3$  or  $\text{NCCHCHCOCH}_3$ ), 6.78 (BB', 4H,  $\text{NCCCHCHC}$  or  $\text{NCCHCHC}$ ), 3.81 (s, 12H,  $\text{OCH}_3$ ).  $^{13}\text{C}$ -NMR (101 MHz, acetone- $d_6$ , 299 K):  $\delta$  / ppm = 158.0 (quart), 150.6 (quart), 140.6 (quart), 133.49 ( $\text{CCCCCCHCHC}$  or  $\text{CCCCCHCHC}$ ), 133.46 ( $\text{NCCHCHC}$  or  $\text{NCCHCHC}$ ), 132.3 ( $\text{CCCCCCHCHC}$  or  $\text{CCCCCHCHC}$ ), 128.6 ( $\text{NCCHCHCOCH}_3$  or  $\text{NCCHCHCOCH}_3$ ), 126.1 (quart), 121.3 (quart), 118.9 ( $\text{NCCHCHC}$  or  $\text{NCCHCHC}$ ), 115.9 ( $\text{NCCHCHC}$  or  $\text{NCCHCHC}$ ), 113.5 (quart), 94.3 (quart), 88.3 (quart), 82.9 (quart), 75.9 (quart), 55.7 ( $\text{OCH}_3$ ). IR (KBr):  $\tilde{\nu}$  = 3036 (w), 2996 (w), 2950 (w), 2929 (vw), 2900 (vw), 2832 (w), 1592 (m), 1505 (vs), 1463 (w), 1440 (w), 1405 (vw), 1323 (m), 1285 (w), 1241 (s), 1188 (w), 1178 (w), 1134 (w), 1104 (w), 1035 (m), 827 (s), 721 (w), 577 (w)  $\text{cm}^{-1}$ . MS (ESI pos, high resolution):  $m/z$  found: 856.33020, calculated for  $\text{C}_{60}\text{H}_{44}\text{N}_2\text{O}_4$ : 856.33011 ( $\Delta\text{ppm} = 0.11$ ).

**Synthesis of 2-{4-[Bis-(4-methoxyphenyl)amino]phenylethynyl}-5-trimethylsilanylethynylbenzonitrile (4b):** (4-Ethynylphenyl)-bis(4-methoxyphenyl)amine (**2**) (2.00g, 6.07 mmol, 1.00 equiv.), 2-iodo-5-trimethylsilanylethynylbenzonitrile (**3**) (2.72 g, 8.36 mmol, 1.38 equiv.), CuI (135 mg, 0.71 mmol, 0.12 equiv.) and  $\text{Pd}(\text{PPh}_3)_2\text{Cl}_2$  (480 mg, 0.68 mmol, 0.11 equiv.) were dissolved in dry diethylamine and the mixture was stirred under a nitrogen atmosphere at room temperature for 24 h. The solvent was removed in vacuo and the residue was redissolved in dichloromethane and washed with water. The organic layer was dried over  $\text{MgSO}_4$  and the solvent was removed under reduced pressure. The crude product was purified by flash chromatography over silica gel eluting with ethyl acetate / petroleum ether (2 / 98) to obtain a yellow solid (2.00 g, 3.80 mmol, 63 %), m.p. 52-53 °C.  $^1\text{H}$ -NMR (600 MHz, acetone- $d_6$ , 299 K):  $\delta$  / ppm = 7.88 (dd,  $^4J_{\text{HH}} = 1.7$  Hz,  $^5J_{\text{HH}} = 0.6$  Hz, 1H,  $\text{CCHCCN}$ ), 7.73 (dd,  $^3J_{\text{HH}} = 8.2$  Hz,  $^4J_{\text{HH}} = 1.7$  Hz, 1H,  $\text{SiCCCCCHCH}$ ), 7.66 (dd,  $^3J_{\text{HH}} = 8.2$  Hz,  $^5J_{\text{HH}} = 0.6$  Hz, 1H,  $\text{SiCCCCCHCHC}$ ), 7.40 (AA', 2H,  $\text{NCCHCHCC}$  or  $\text{NCCHCHCC}$ ), 7.15 (AA', 4H,  $\text{OCCHCHC}$  or  $\text{OCCHCHC}$ ), 6.96 (BB', 4H,  $\text{OCCHCHC}$  or  $\text{OCCHCHC}$ ), 6.80 (BB', 2H,  $\text{NCCHCHCC}$  or  $\text{NCCHCHCC}$ ), 3.81 (s, 6H,  $\text{OCH}_3$ ), 0.25 (s, 9H,  $\text{Si}(\text{CH}_3)_3$ ).  $^{13}\text{C}$ -NMR (101 MHz, acetone- $d_6$ , 299 K):  $\delta$  / ppm = 157.3 (quart), 150.4 (quart), 140.0 (quart), 136.5 ( $\text{CCHCCN}$ ), 136.4 ( $\text{SiCCCCCHCH}$ ), 133.5 ( $\text{NCCHCHCC}$  or  $\text{NCCHCHCC}$ ), 132.6 ( $\text{SiCCCCCHCHC}$ ), 128.5 ( $\text{OCCHCHC}$  or  $\text{OCCHCHC}$ ), 127.6 (quart), 123.3 (quart), 118.3 ( $\text{NCCHCHCC}$  or  $\text{NCCHCHCC}$ ), 117.3 (quart), 115.3 (quart), 115.2 ( $\text{OCCHCHC}$  or  $\text{OCCHCHC}$ ), 111.9 (quart), 102.6 (quart), 99.4 (quart), 99.0 (quart), 85.1 (quart), 55.5 ( $\text{OCH}_3$ ), -0.2 ( $\text{SiCH}_3$ ). IR (KBr):  $\tilde{\nu}$  = 3039 (vw), 2999 (vw), 2955 (m), 2834 (w), 2201 (s), 2147 (m), 1591 (s), 1505 (vs), 1463 (w), 1441 (w), 1328 (m), 1280 (m), 1242 (vs), 1189 (w), 1152 (m), 1105 (w), 1034 (m), 935 (w), 858 (s), 827 (s), 760 (m), 731 (m), 640 (m), 607 (w), 577 (m)  $\text{cm}^{-1}$ . MS (EI, 70 eV) [ $m/z$ , %]: 526 (100,  $\text{M}^+$ ), 511 (20,  $\text{M}^+ - \text{CH}_3$ ). MS (APCI pos, high resolution):  $m/z$  found: 527.21596, calculated for  $\text{C}_{34}\text{H}_{31}\text{N}_2\text{O}_2\text{Si}^+$ : 527.21548 ( $\Delta\text{ppm} = 0.91$ ).

**Synthesis of 1,4-Bis{4-[2-(4-bis(4-methoxyphenyl)amino)phenyl]ethynyl}-3-cyanophenyl}buta-1,3-diyne (1b):** Silane **4b** (250 mg, 475  $\mu\text{mol}$ , 1.00 equiv.) and  $\text{Cu}(\text{I})\text{Cl}$  (56,4 mg, 570  $\mu\text{mol}$ , 1.20 equiv.) were dissolved in 5 ml of dry dimethylformamide and the solution was stirred vigorously at 60 °C for 3 days. Water (50ml) was added and the mixture was extracted with dichloromethane (3 x 100 ml). The organic layer was washed with water (2 x 100 ml), dried over  $\text{MgSO}_4$  and the solvent was removed in vacuo. The crude product was further purified by flash chromatography on silica gel (petroleum ether / dichloromethane (1 / 1 > 1 / 99)) to obtain a deep red solid (170 mg, 187  $\mu\text{mol}$ , 78 %), m.p. 85 °C.  $^1\text{H}$ -NMR (600 MHz, acetone- $d_6$ , 299 K):  $\delta$  / ppm = 8.07 (dd,  $^4J_{\text{HH}} = 1.8$  Hz,  $^5J_{\text{HH}} = 0.5$  Hz, 2H,  $\text{NCCCCHC}$ ), 7.88 (dd,  $^3J_{\text{HH}} = 8.2$  Hz,  $^4J_{\text{HH}} = 1.8$  Hz, 2H,  $\text{NCCCCHCCH}$ ), 7.73 (dd,  $^3J_{\text{HH}} = 8.2$  Hz,  $^5J_{\text{HH}} = 0.5$  Hz, 2H,  $\text{NCCCCHC}$ ), 7.41 (AA', 4H,  $\text{NCCHCHCC}$  or  $\text{NCCHCHCC}$ ), 7.16 (AA',

8H, OCCHCHCN or OCCHCHCN), 6.97 (BB', 8H, OCCHCHCN or OCCHCHCN), 6.80 (BB', 4H, NCCHCHCC or NCCHCHCC), 3.81 (s, 12H, OCH<sub>3</sub>). <sup>13</sup>C-NMR (151 MHz, acetone-d<sub>6</sub>, 299 K): δ / ppm = 158.2 (quart), 151.4 (quart), 140.2 (quart), 137.4 (NCCCHC), 137.2 (NCCCHCCHCH), 133.9 (NCCHCHCC or NCCHCHCC), 133.0 (NCCCHCH), 129.1 (quart), 128.8 (OCCHCHCN or OCCHCHCN), 121.6 (quart), 118.4 (NCCHCHCC or NCCHCHCC), 117.2 (quart), 116.0 (quart), 115.9 (OCCHCHCN or OCCHCHCN), 111.9 (quart), 101.1 (quart), 85.6 (quart), 81.7 (quart), 76.8 (quart), 55.5 (OCH<sub>3</sub>). IR (KBr):  $\tilde{\nu}$  = 3039 (vw), 2954 (w), 2927 (w), 2830 (w), 2200 (m), 1587 (s), 1504 (vs), 1461 (w), 1439 (w), 1319 (m), 1287 (m), 1240 (s), 1188 (w), 1150 (m), 1090 (w), 1032 (m), 826 (s), 727 (m), 575 (m), 526 (w), 504 (w) cm<sup>-1</sup>. MS (APCI pos, high resolution): *m/z* found: 907.32957, calculated for C<sub>62</sub>H<sub>43</sub>N<sub>4</sub>O<sub>4</sub><sup>+</sup>: 907.32843 (Δppm = 1.26).

### CV of compound 1b:

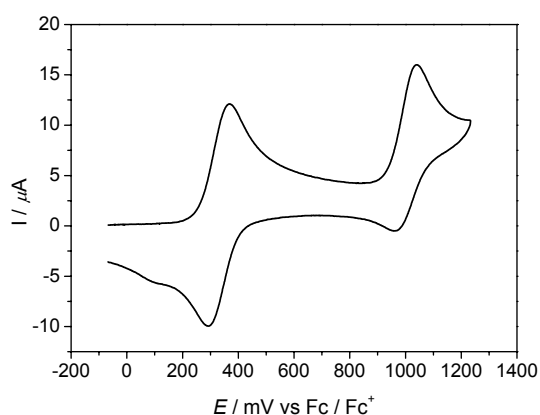

CV of compound **1b** in a dichloromethane / 0.1 M tetrabutylammonium hexafluorophosphate solution, scan rate 250 mV/s. The signal observed at ca. 100 mV is due to the irreversible oxidation processes of the dication to higher oxidised species at ca. 1100 mV. This irreversibility is also confirmed by thin layer measurements.

### Digital simulation of the CV of 1b:

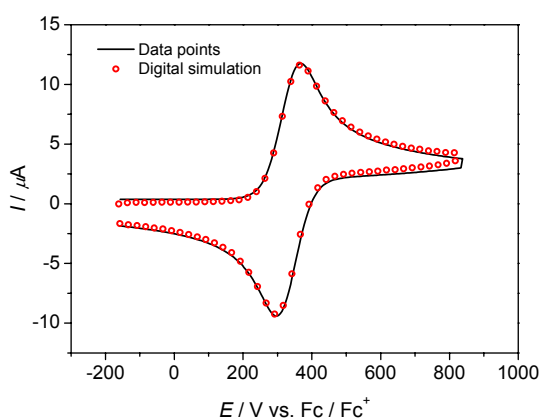

The digital simulation of the first two unresolved oxidation processes yields:  $E_{\text{Ox}}^1 = 330$  mV and  $E_{\text{Ox}}^2 = 385$  mV versus Fc / Fc<sup>+</sup>. From the separation of the half wave potentials the disproportionation coefficient  $K_c$  for the equilibrium (1) can be determined with eqn. 1.

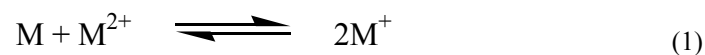

$$K_c = e^{\frac{(E_{Ox}^2 - E_{Ox}^1)F}{RT}} \quad (\text{eqn. 1})$$

From the disproportionation coefficient  $K_c$  the real concentration of the monocation can be calculated. Owing to the uncertainty of the redox potential difference,  $K_c$  also has a large error and cannot be used to calculate the real concentration of  $1b^+$  in solution.

**AM1 Calculations:** The semiempirical calculations were done using the AM1 parametrisation implemented in the MOPAC 2002 program. The optimisation of the structures were performed without symmetry restrictions in Cartesian coordinates by the eigenvector following (EF) method. Self consistent field (SCF) convergence was achieved by Pulay's method. The configuration interactions included singles and doubles excitations (CISD) within an active orbital window comprising the four highest doubly occupied, one single occupied, and two lowest unoccupied orbitals. The solvent influence on the optical properties was modeled by the COSMO method for a solvent with  $\epsilon = 2.0$  and a solvent radius of 2.5 Å at the CISD optimised gas phase structures.
